# Supplementary material for: A DNA Damage Response System Associated with the phosphoCTD of Elongating RNA Polymerase II
Source: PLOS journal article supplement (doi:10.1371/journal.pone.0060909), 2013-04-16

Fig. S3

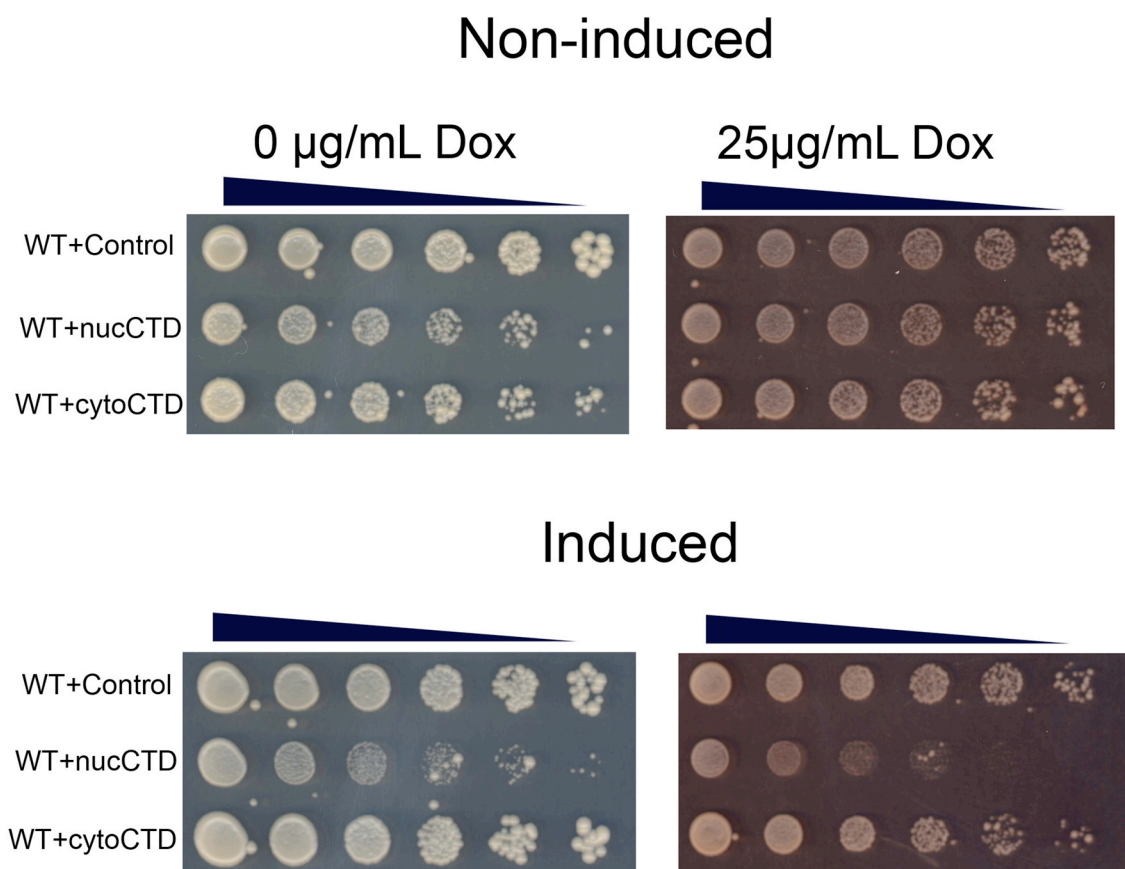

Supplement: S3 (10.1371/journal.pone.0060909.s003) [file journal.pone.0060909.s003]
